# Supplementary material for: Eunicellin-Based Diterpenoids, Hirsutalins S–V, from the Formosan Soft Coral Cladiella hirsuta
Source: PubMed Central journal article supplement (PMC4446604; doi:10.3390/md13052757), 2015-04-30
Supplement: marinedrugs-13-02757-s001.pdf [file marinedrugs-13-02757-s001.pdf]

# Supplementary Information

## List of Contents

- Figure S1.** HRESIMS spectrum of **1**.
- Figure S2.**  $^1\text{H}$  NMR spectrum of **1** in  $\text{CDCl}_3$ .
- Figure S3.**  $^{13}\text{C}$  NMR spectrum of **1** in  $\text{CDCl}_3$ .
- Figure S4.** HRESIMS spectrum of **2**.
- Figure S5.**  $^1\text{H}$  NMR spectrum of **2** in  $\text{CDCl}_3$ .
- Figure S6.**  $^{13}\text{C}$  NMR spectrum of **2** in  $\text{CDCl}_3$ .
- Figure S7.** HRESIMS spectrum of **3**.
- Figure S8.**  $^1\text{H}$  NMR spectrum of **3** in  $\text{CDCl}_3$ .
- Figure S9.**  $^{13}\text{C}$  NMR spectrum of **3** in  $\text{CDCl}_3$ .
- Figure S10.** HRESIMS spectrum of **4**.
- Figure S11.**  $^1\text{H}$  NMR spectrum of **4** in  $\text{CDCl}_3$ .
- Figure S12.**  $^{13}\text{C}$  NMR spectrum of **4** in  $\text{CDCl}_3$ .

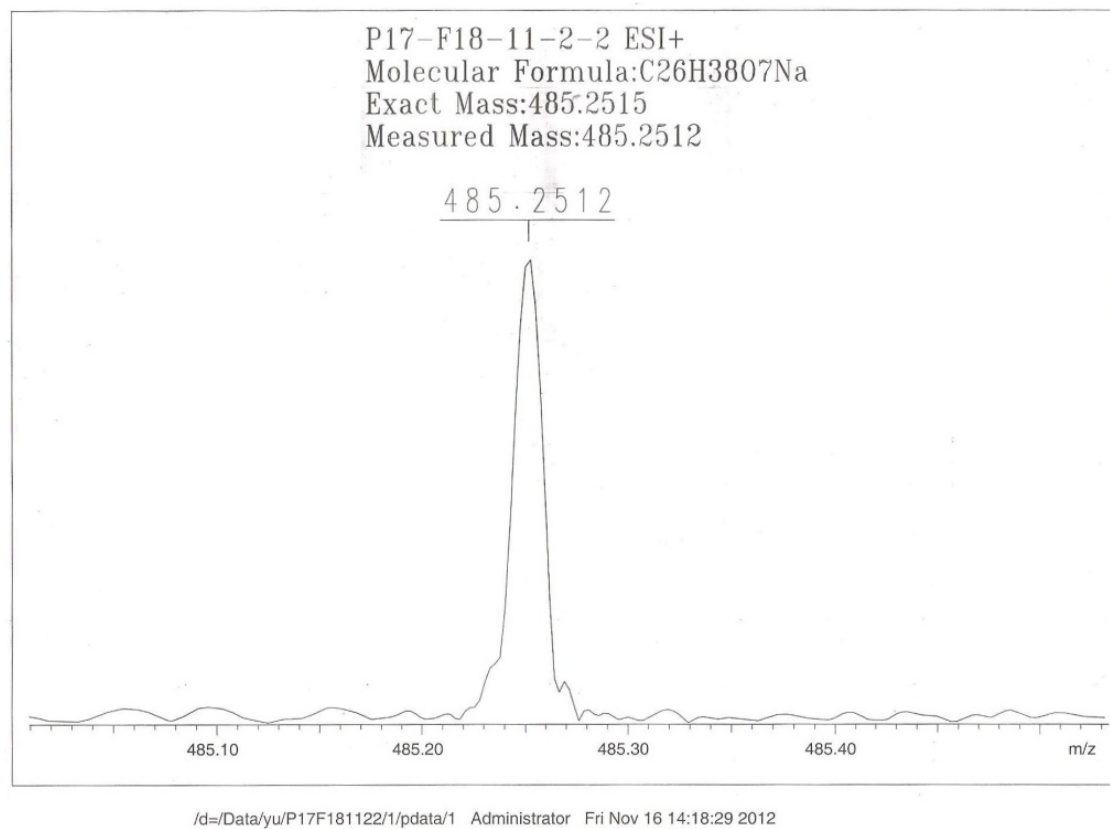

**Figure S1.** HRESIMS spectrum of **1**.

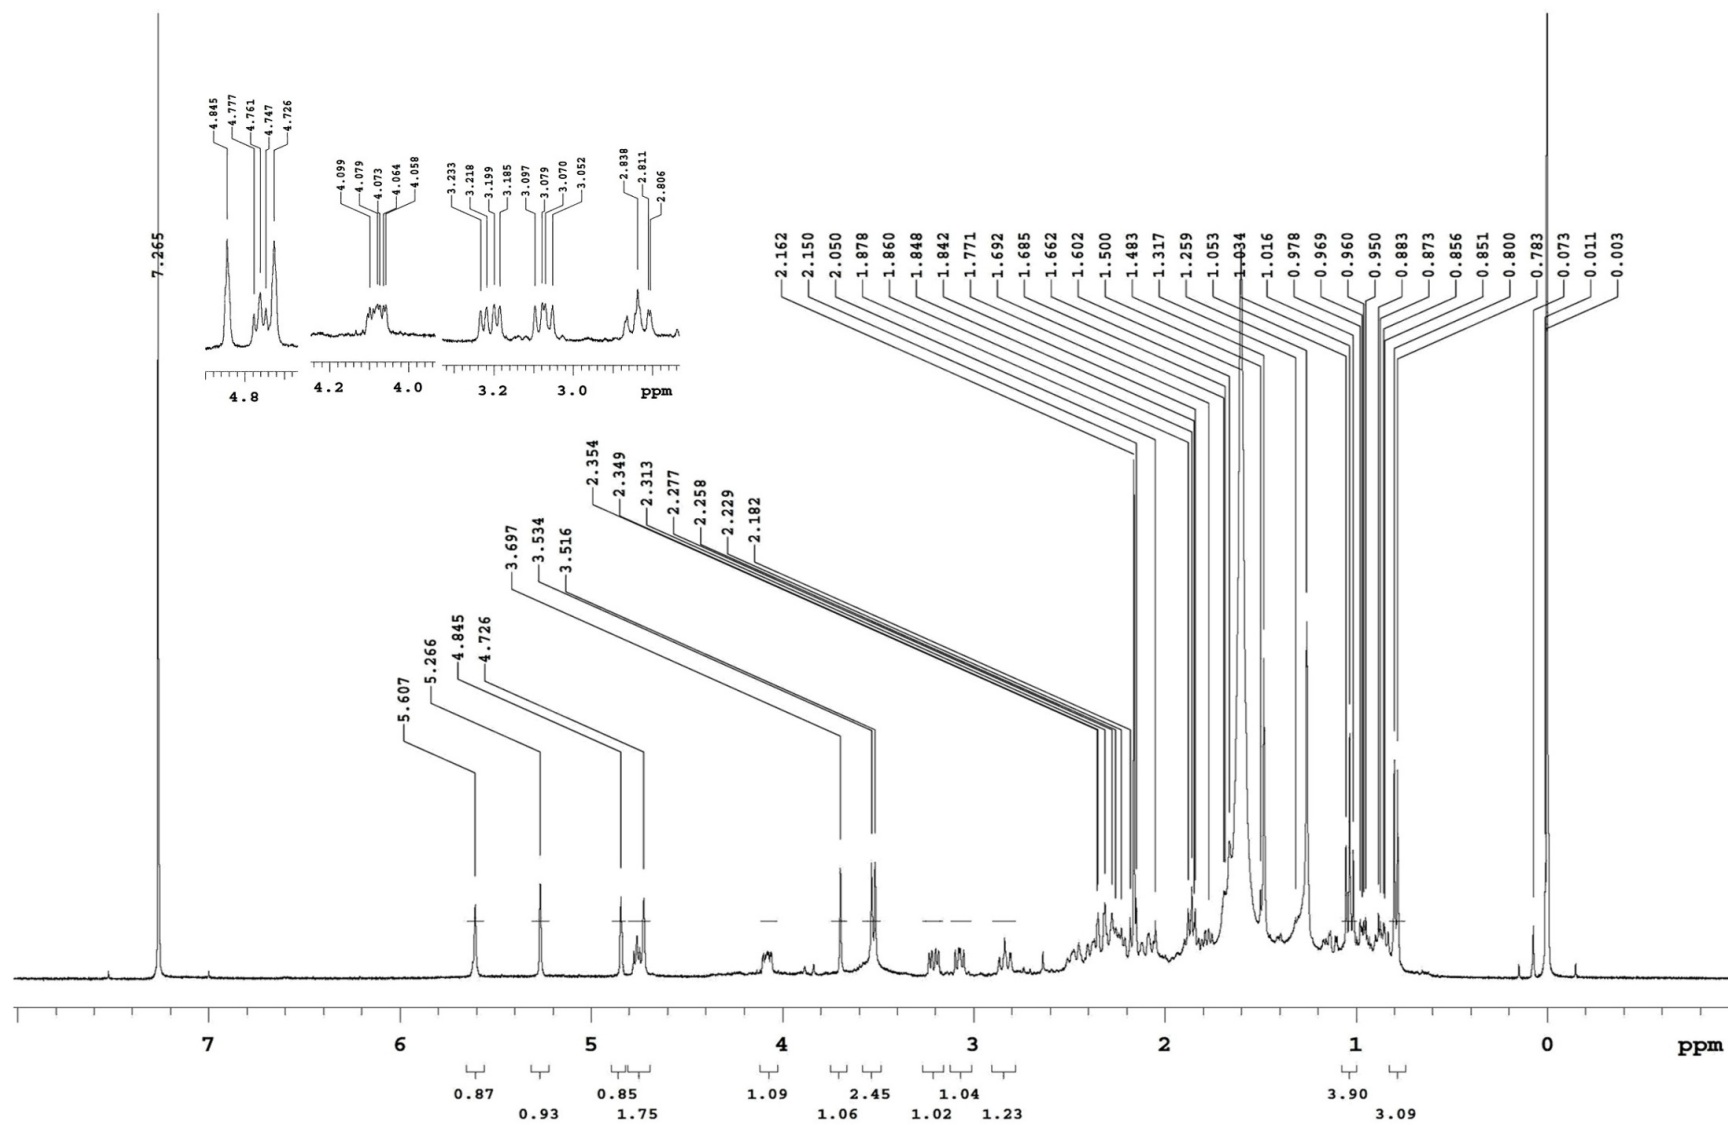Figure S2.  $^1\text{H}$  NMR spectrum of **1** in  $\text{CDCl}_3$ .

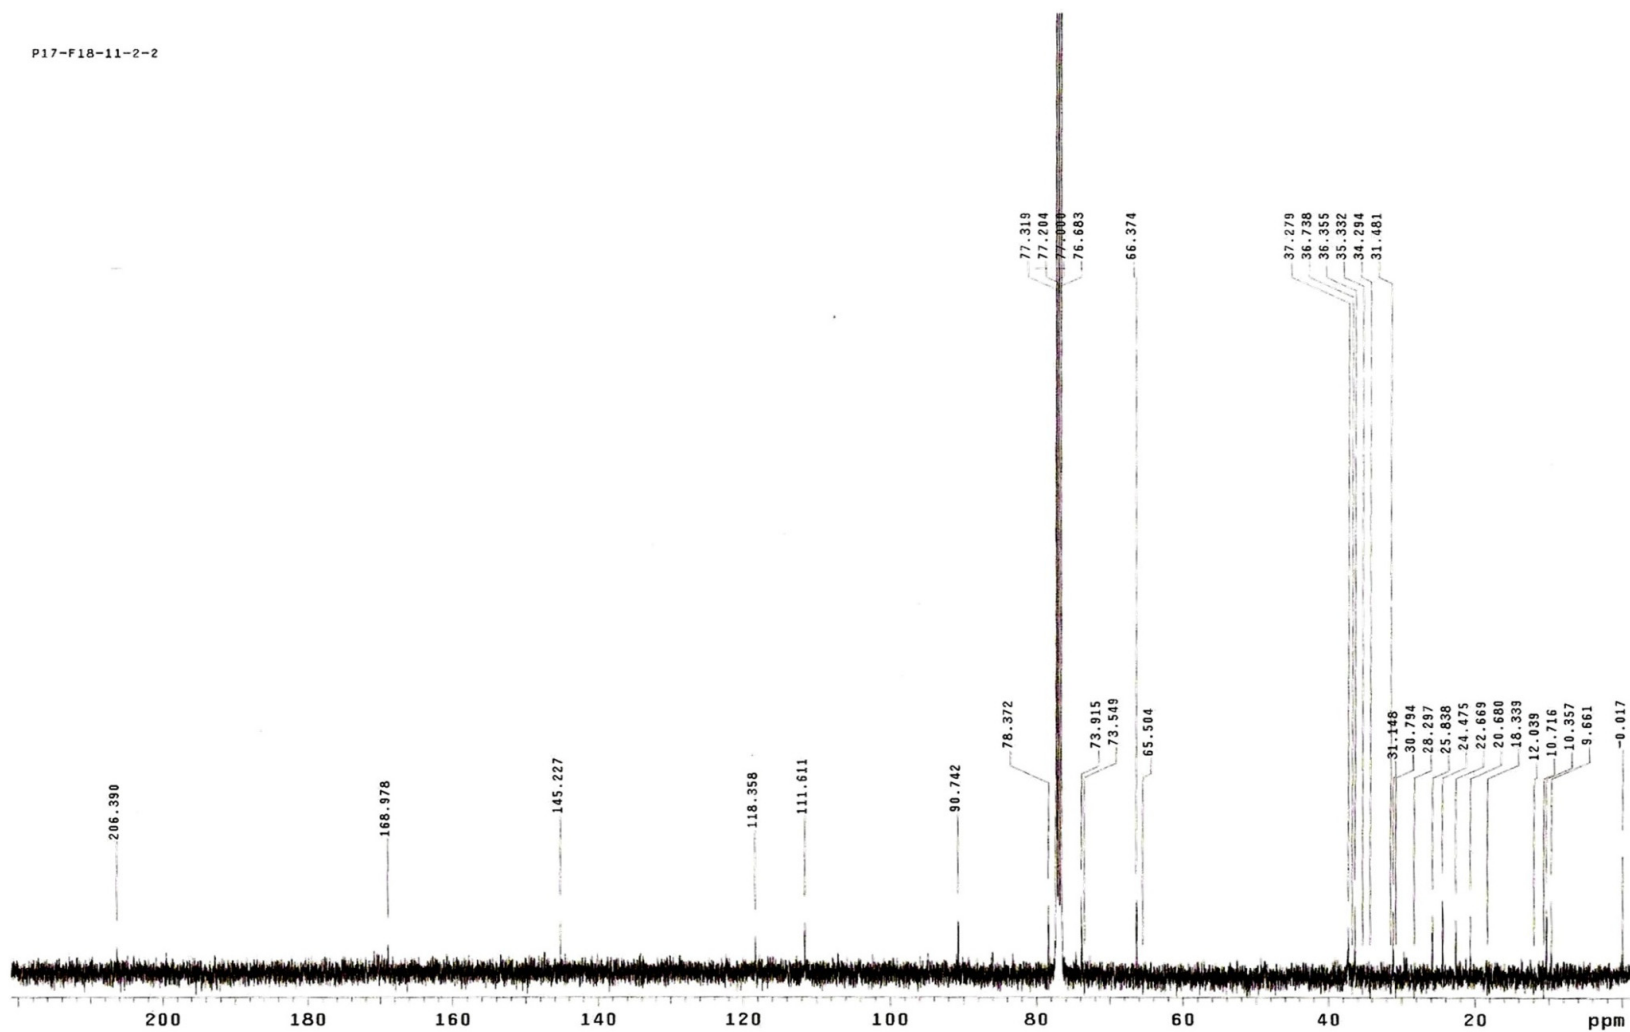

Figure S3.  $^{13}\text{C}$  NMR spectrum of **1** in  $\text{CDCl}_3$ .

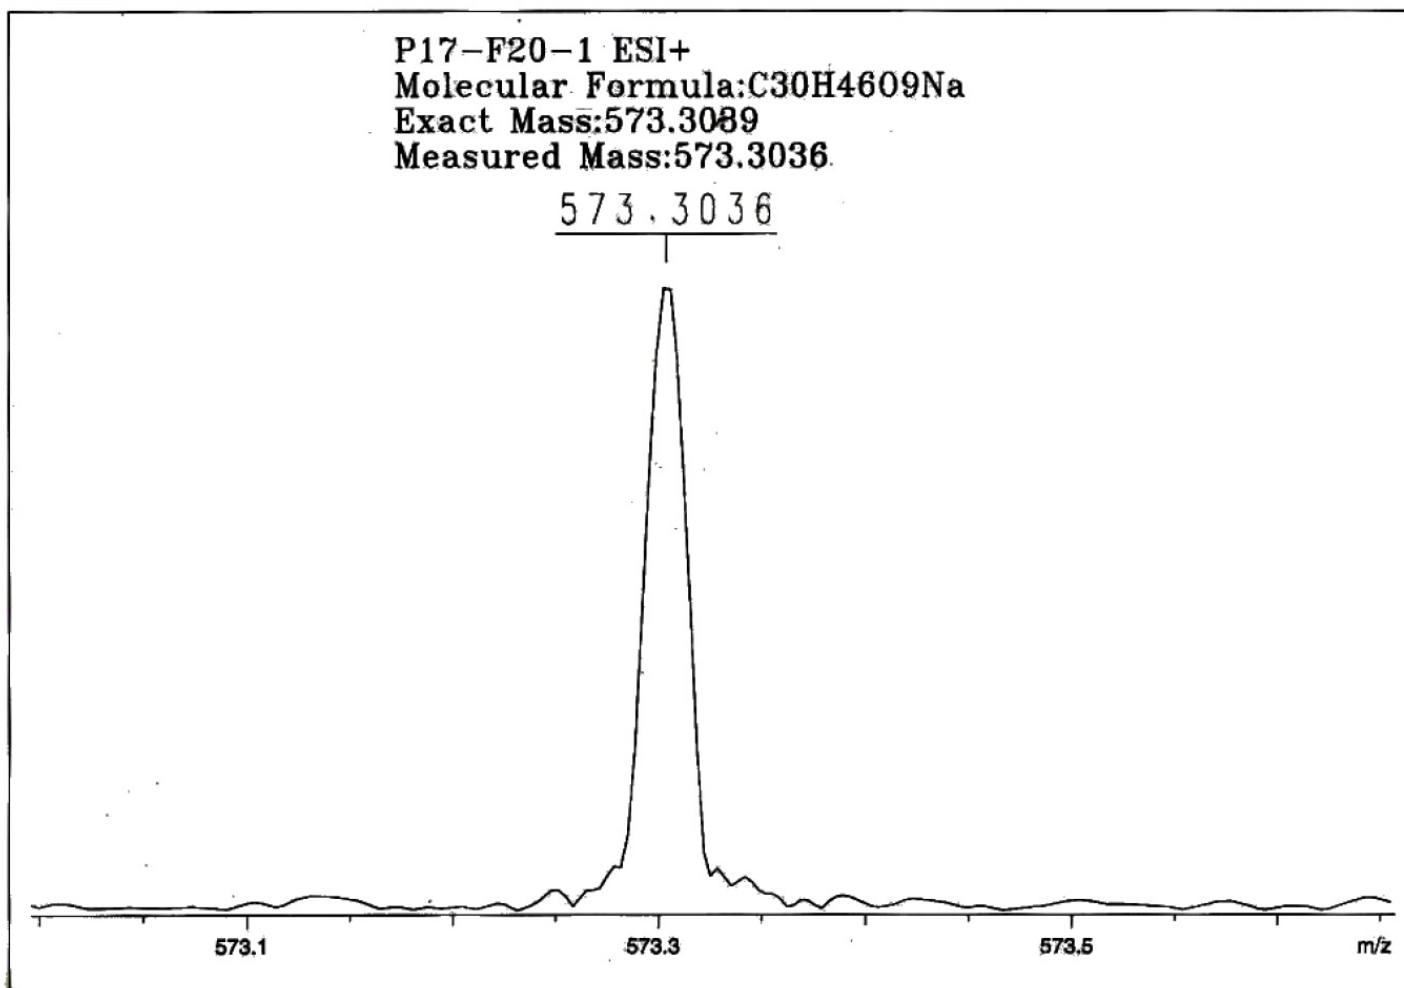

/d=/Data/yl/P17F201/2/pdata/1 Administrator Fri Nov 16 13:53:06 2012

Figure S4. HRESIMS spectrum of 2.

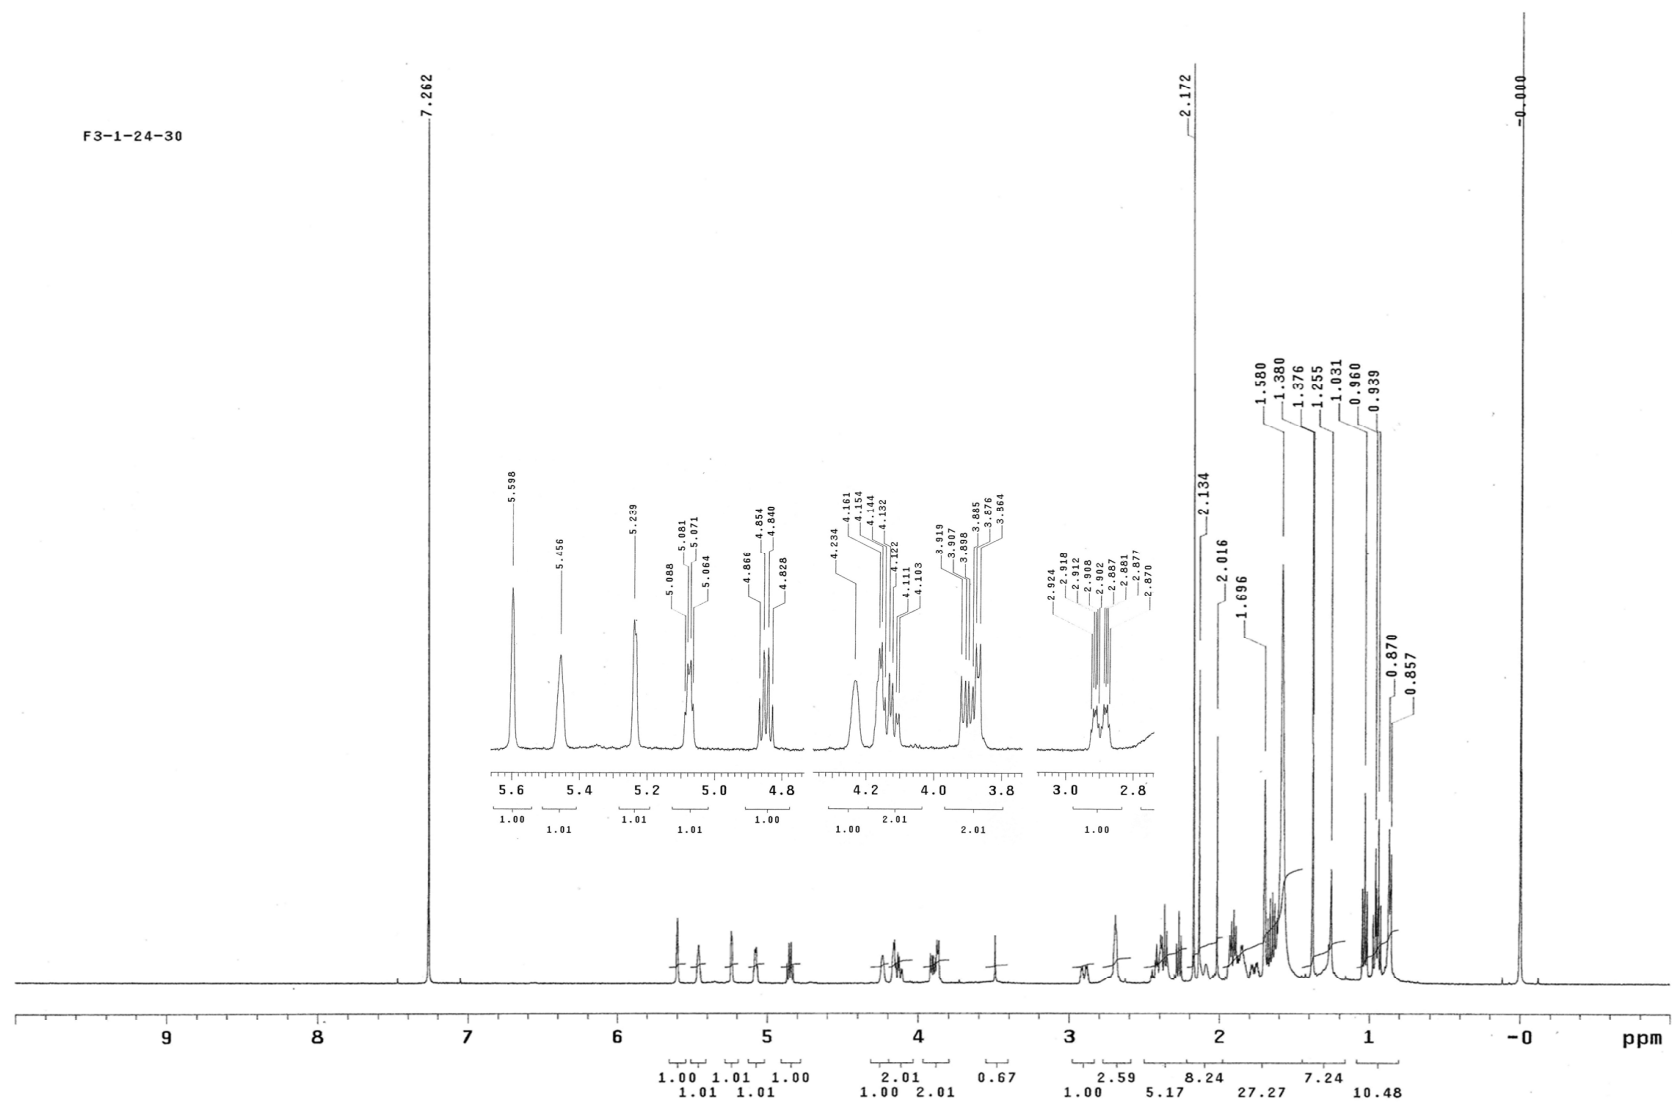

Figure S5. <sup>1</sup>H NMR spectrum of 2 in CDCl<sub>3</sub>.

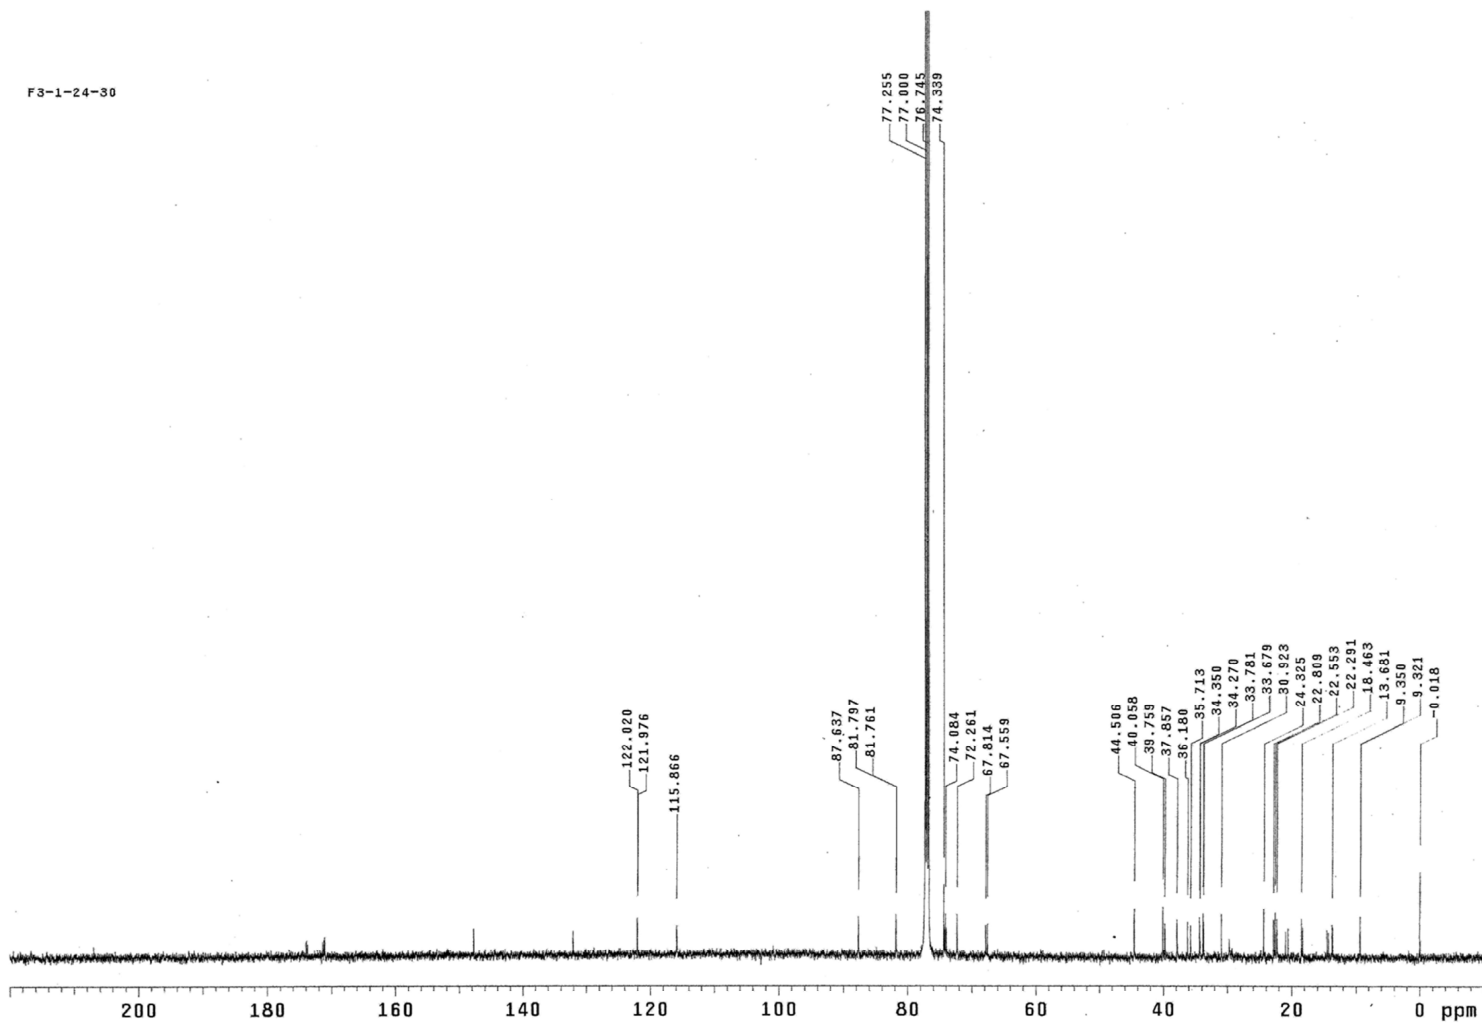

Figure S6. <sup>13</sup>C NMR spectrum of **2** in CDCl<sub>3</sub>.

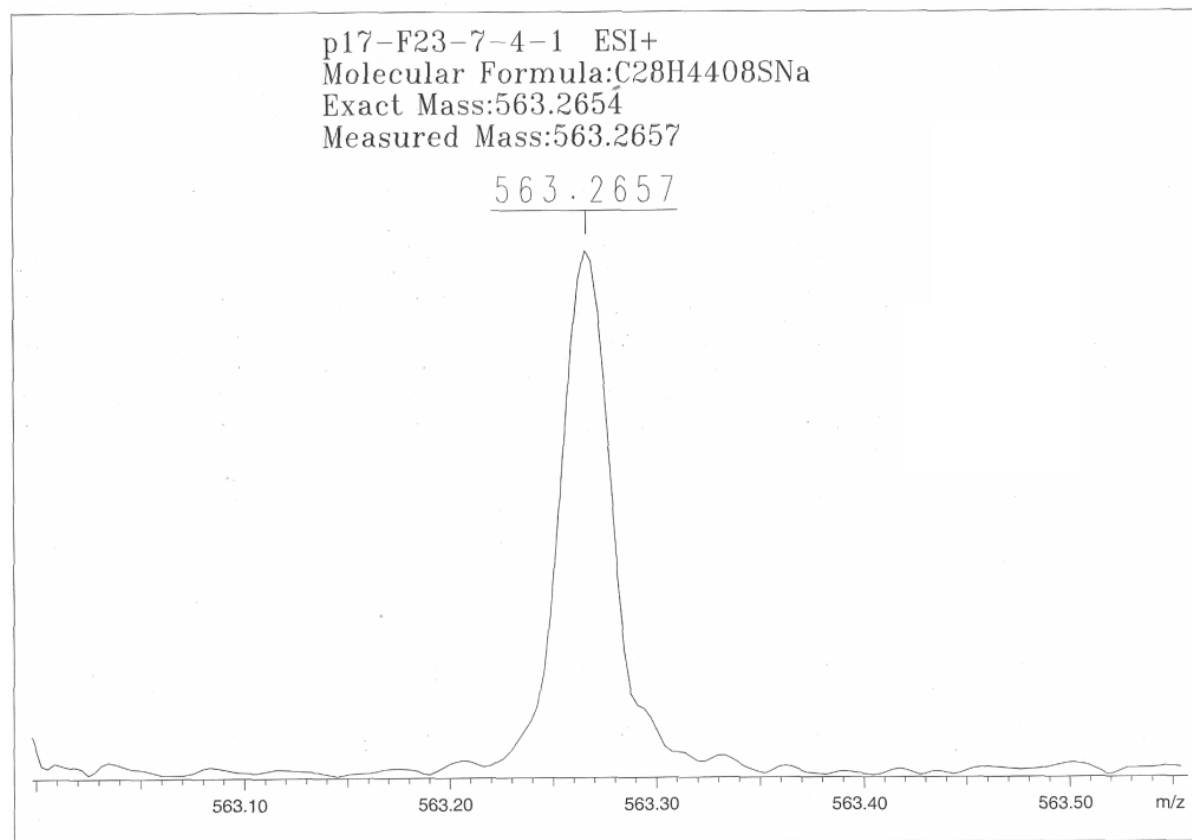

/d=/Data/yl/P17F23741/1/pdata/1 Administrator Tue Jan 8 13:58:20 2013

**Figure S7.** HRESIMS spectrum of **3**.



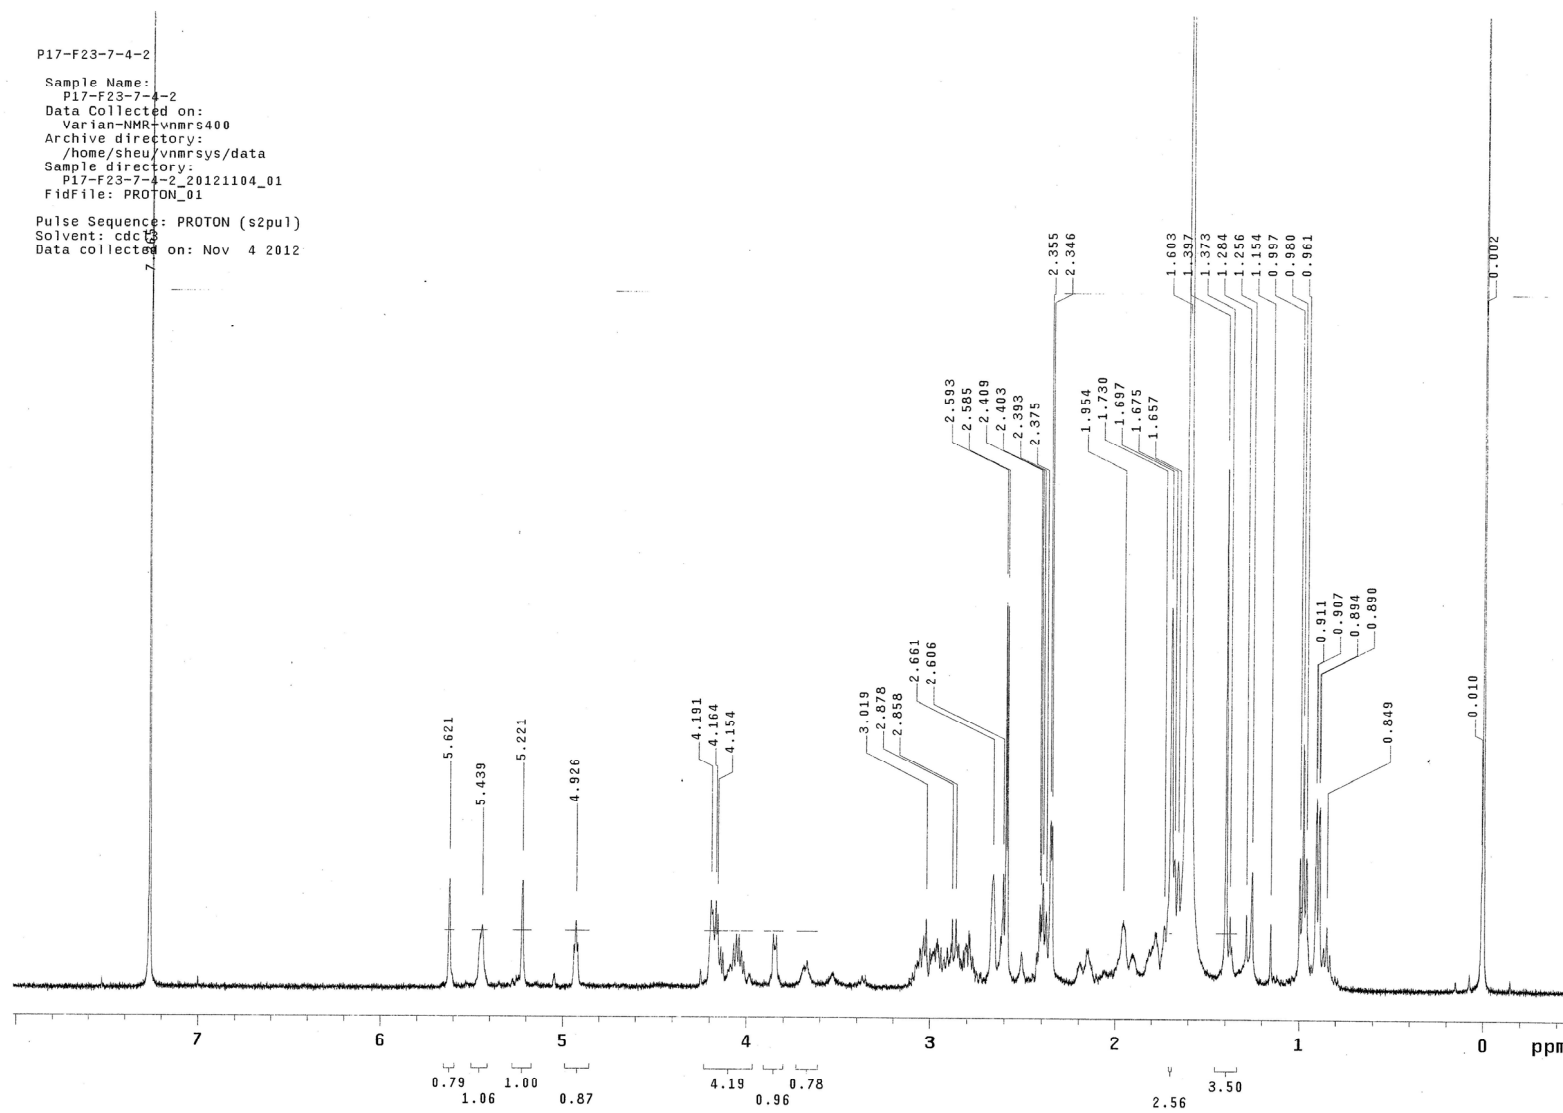

Figure S8.  $^1\text{H}$  NMR spectrum of **3** in  $\text{CDCl}_3$ .

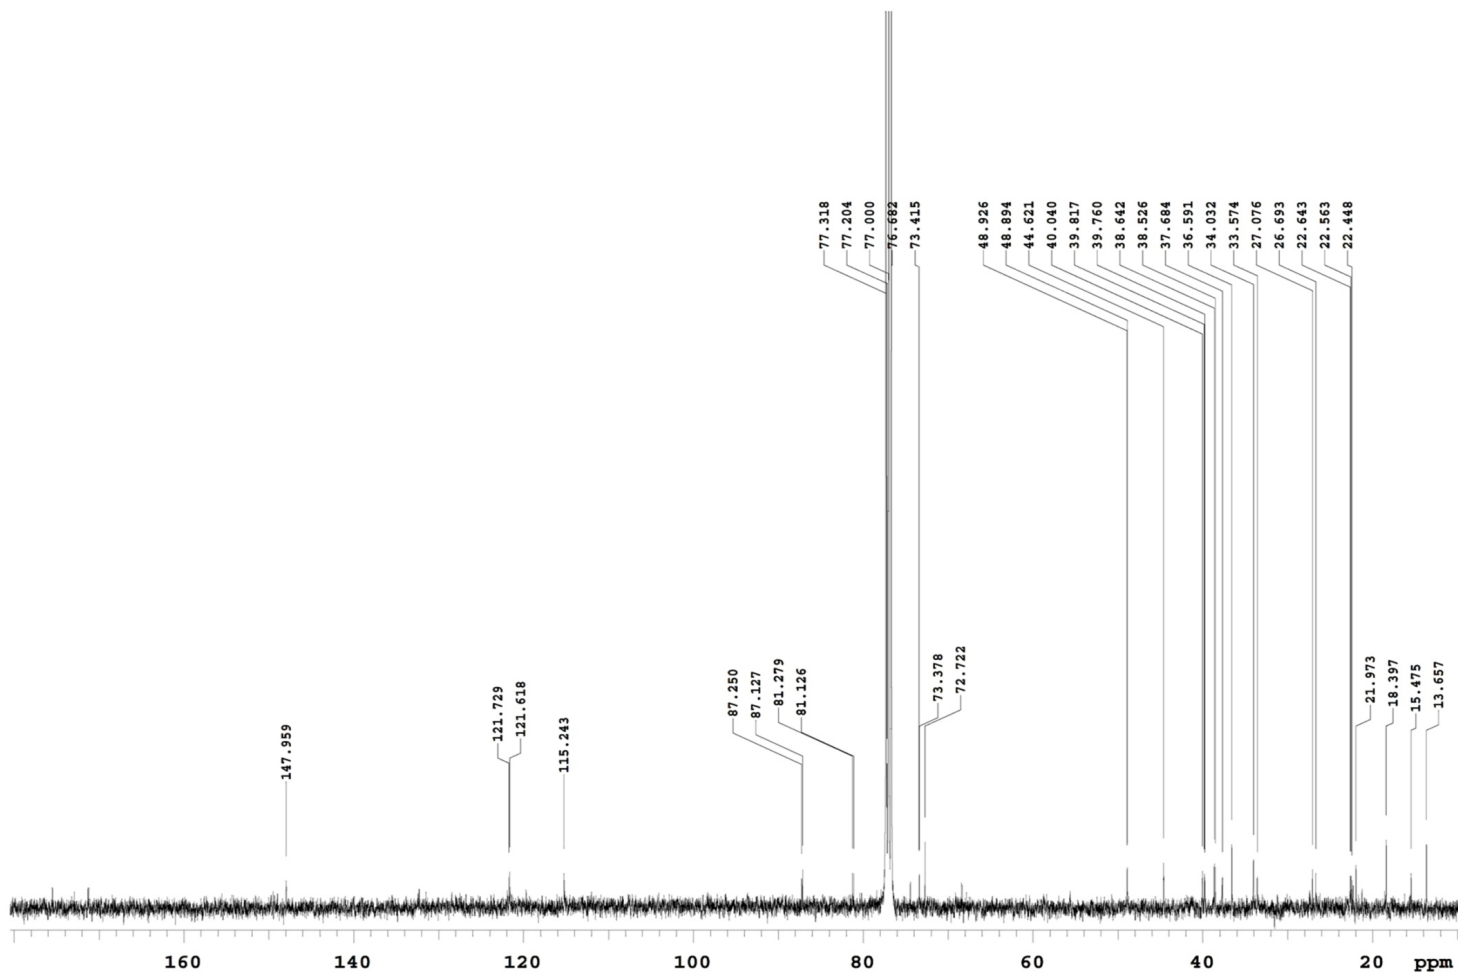

Figure S9. <sup>13</sup>C NMR spectrum of **3** in CDCl<sub>3</sub>.

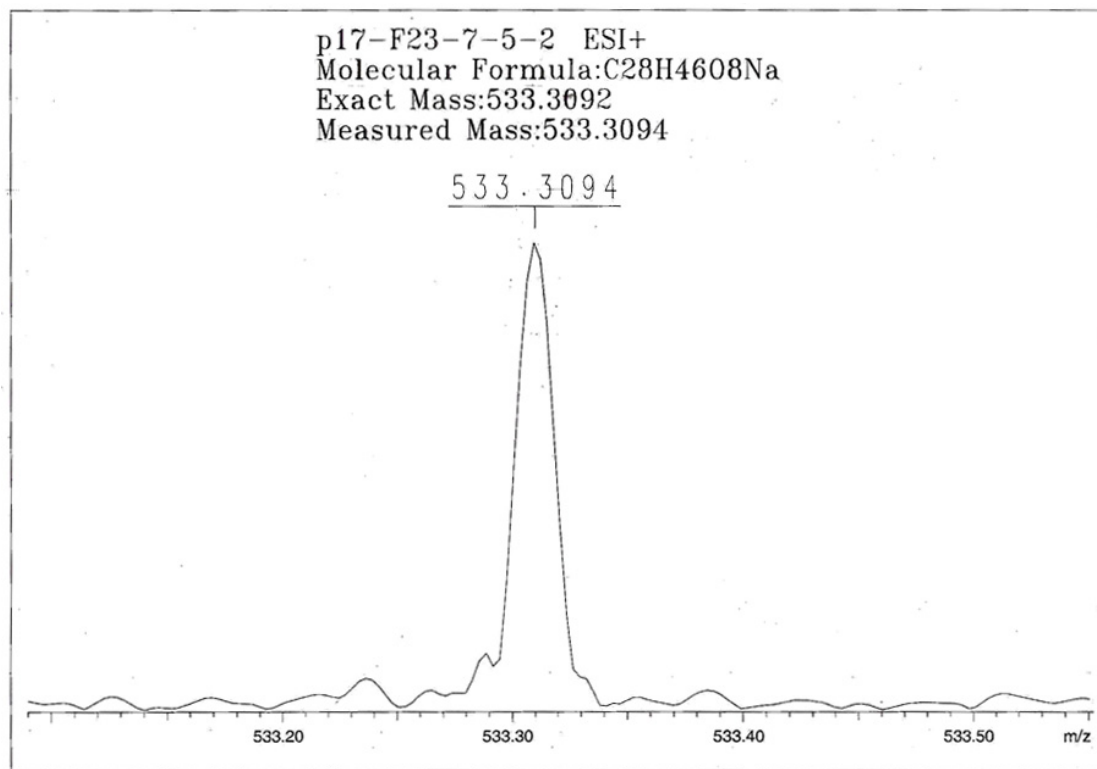

/d=/Data/yy/P17F23752/3/pdata/1 Administrator Mon Nov 12 15:04:26 2012

**Figure S10.** HRESIMS spectrum of **4**.

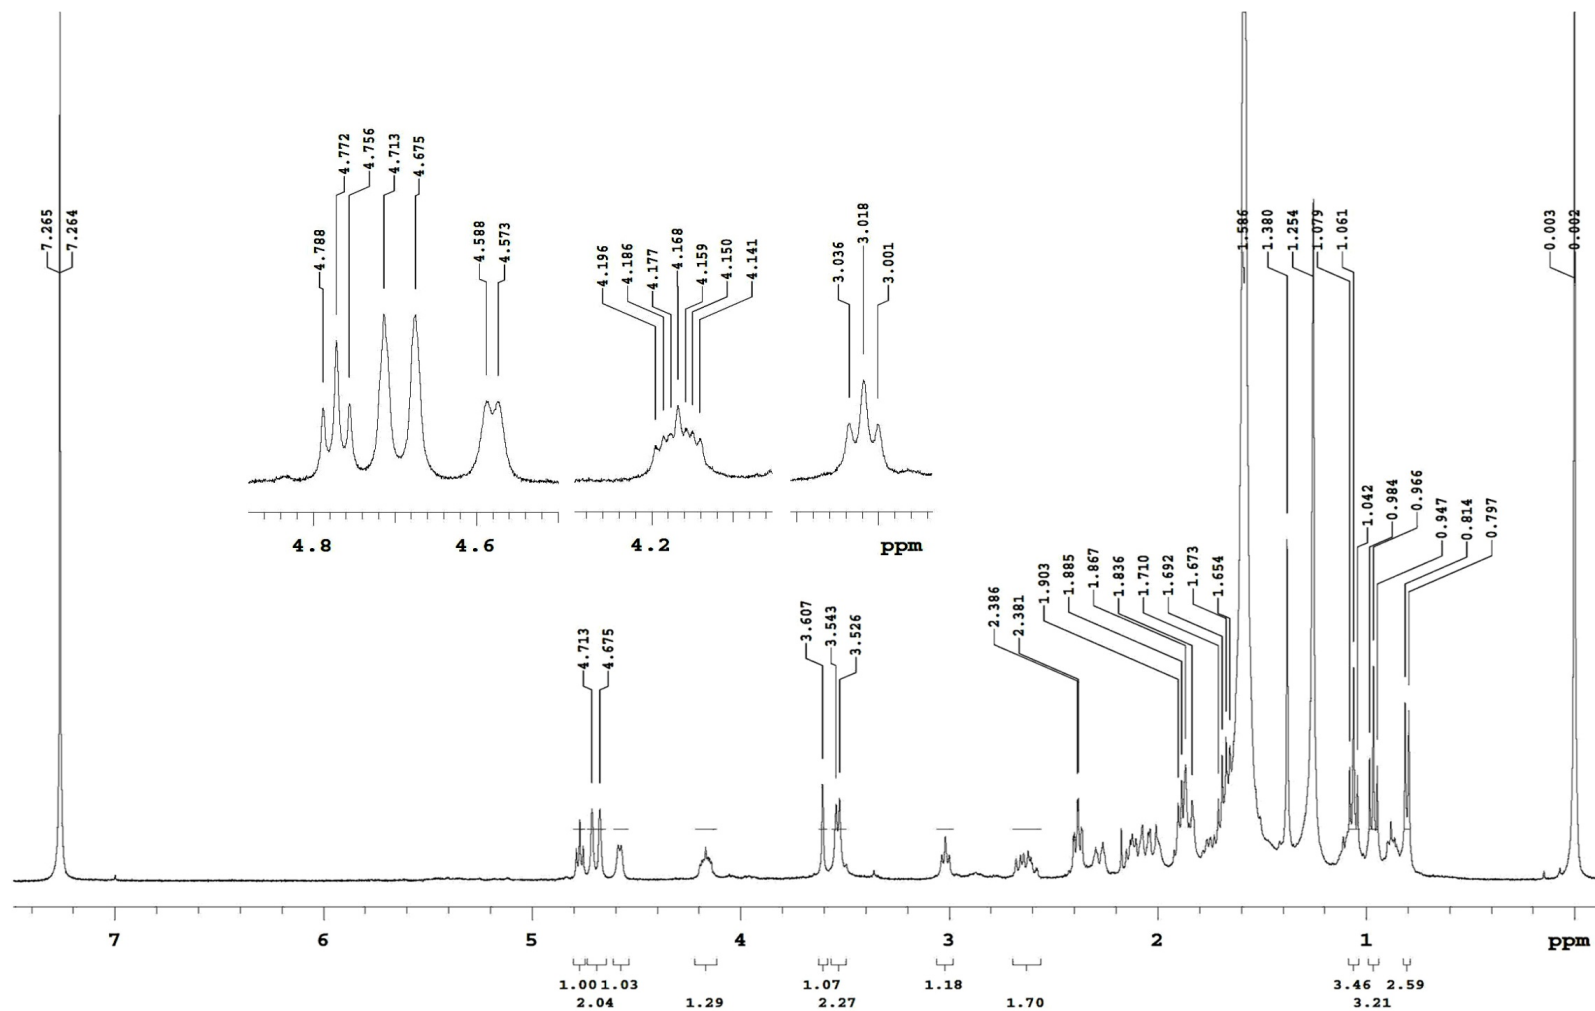Figure S11.  $^1\text{H}$  NMR spectrum of **4** in  $\text{CDCl}_3$ .

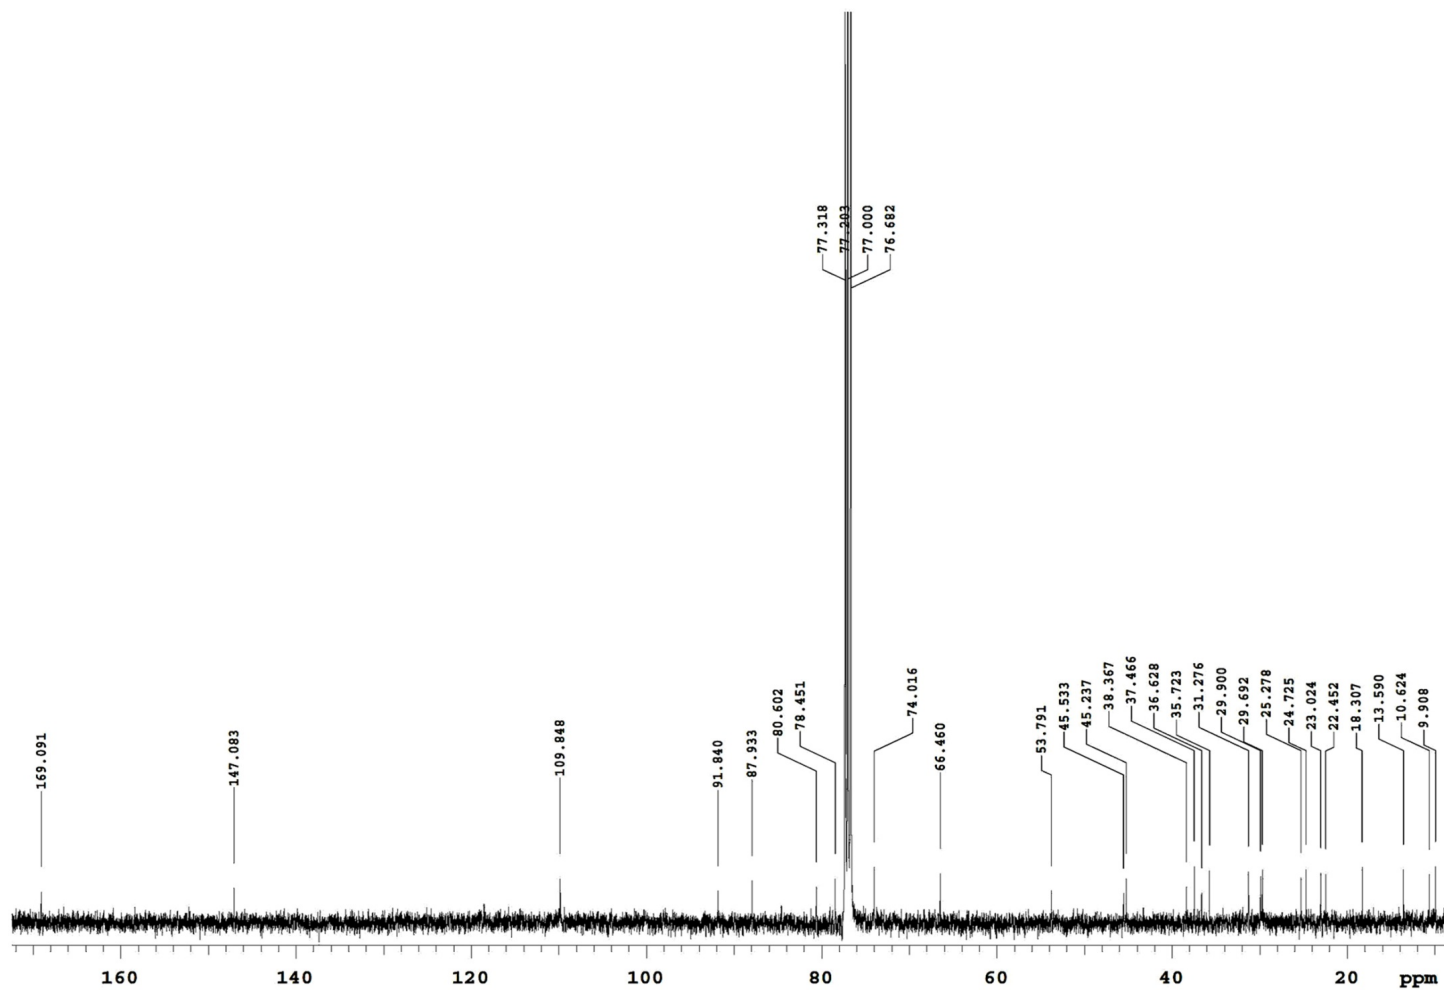

Figure S12.  $^{13}\text{C}$  NMR spectrum of 4 in  $\text{CDCl}_3$ .
